# Supplementary material
Source: PubMed Central journal article supplement (PMC1317584)

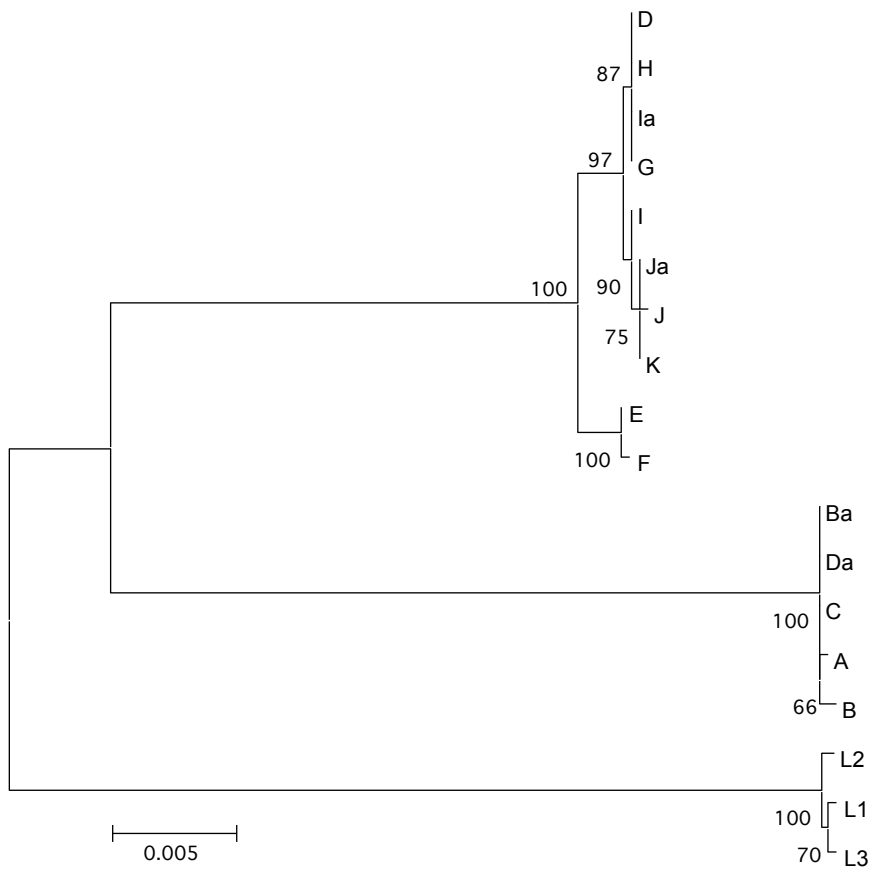

A

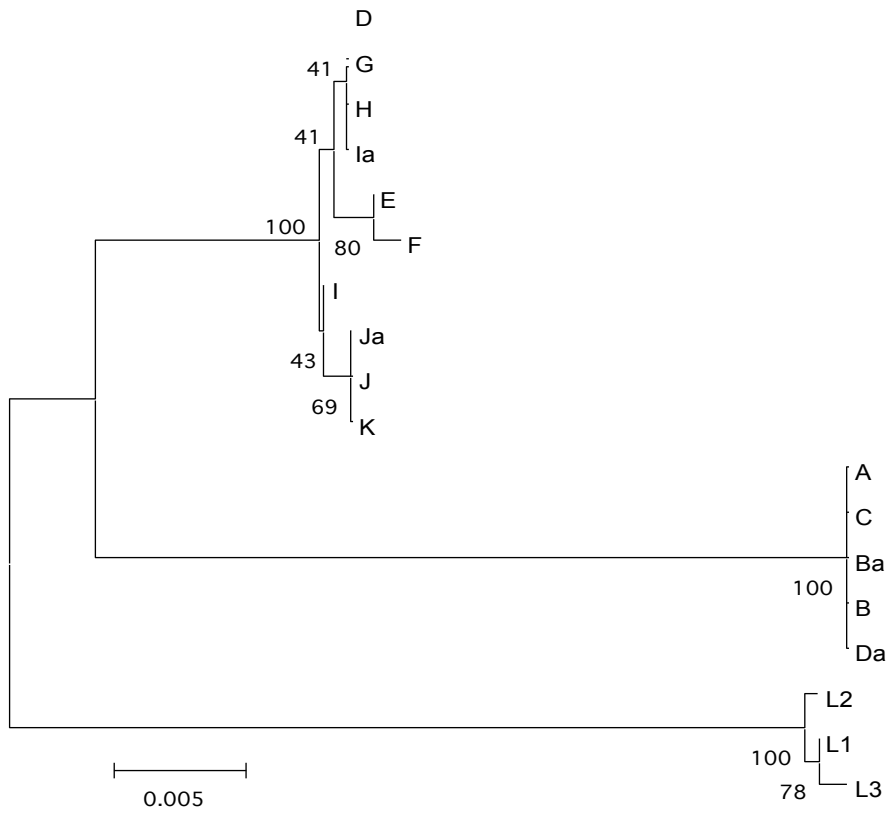

B

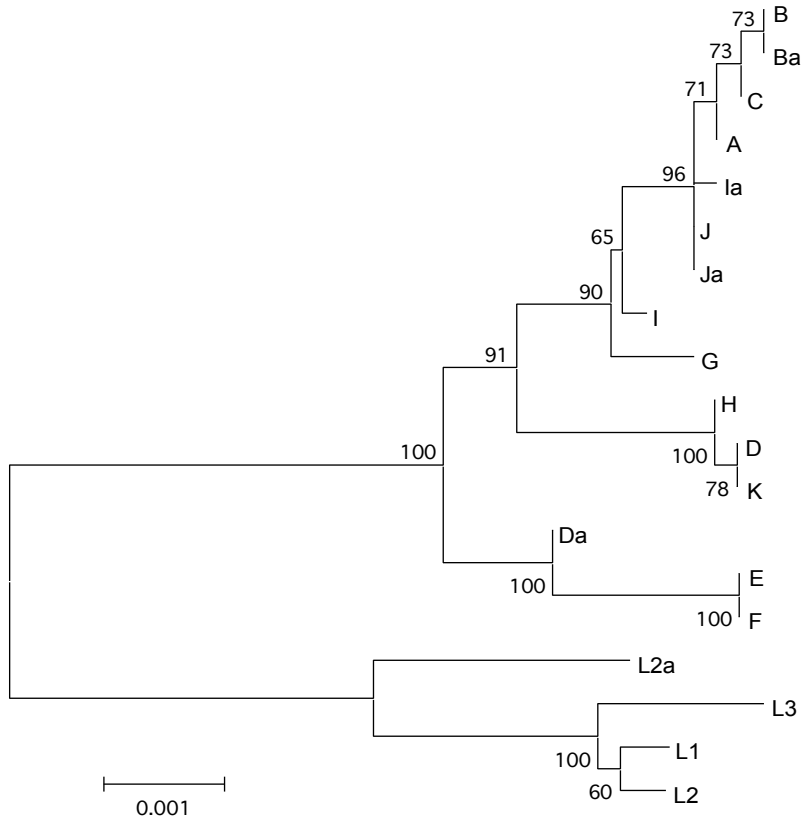

A

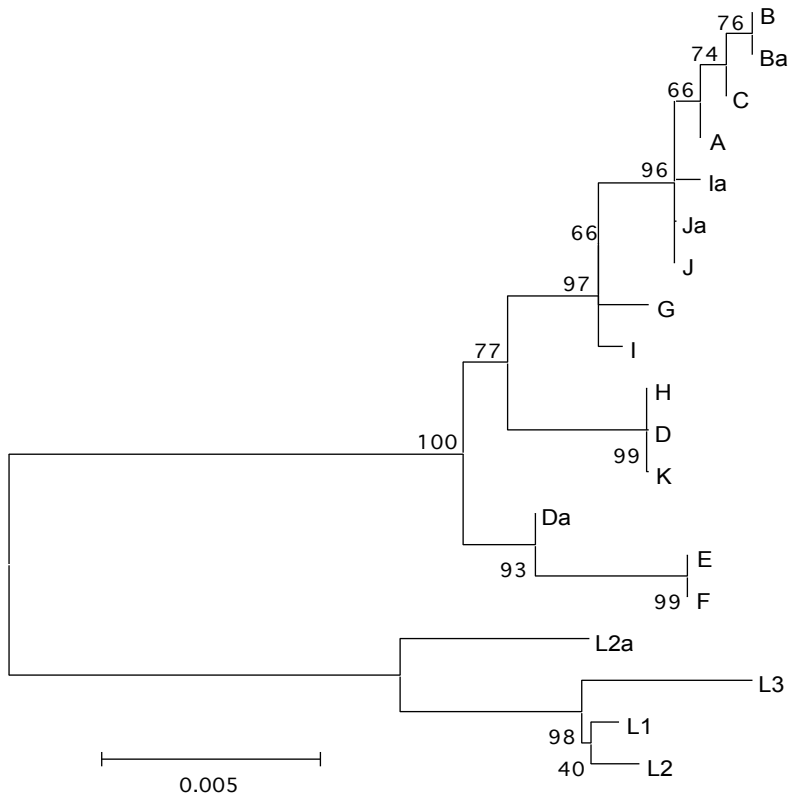

B

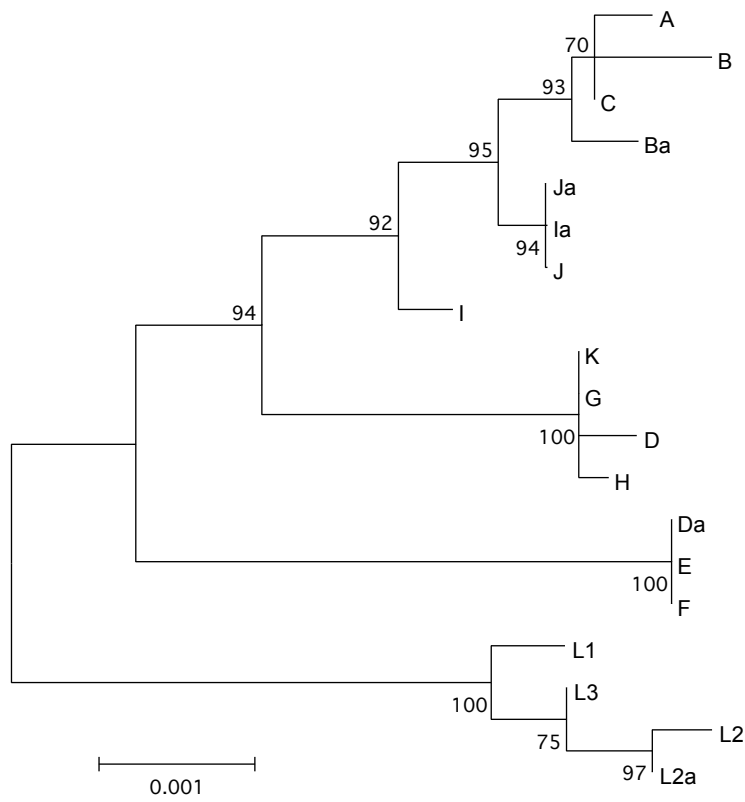

A

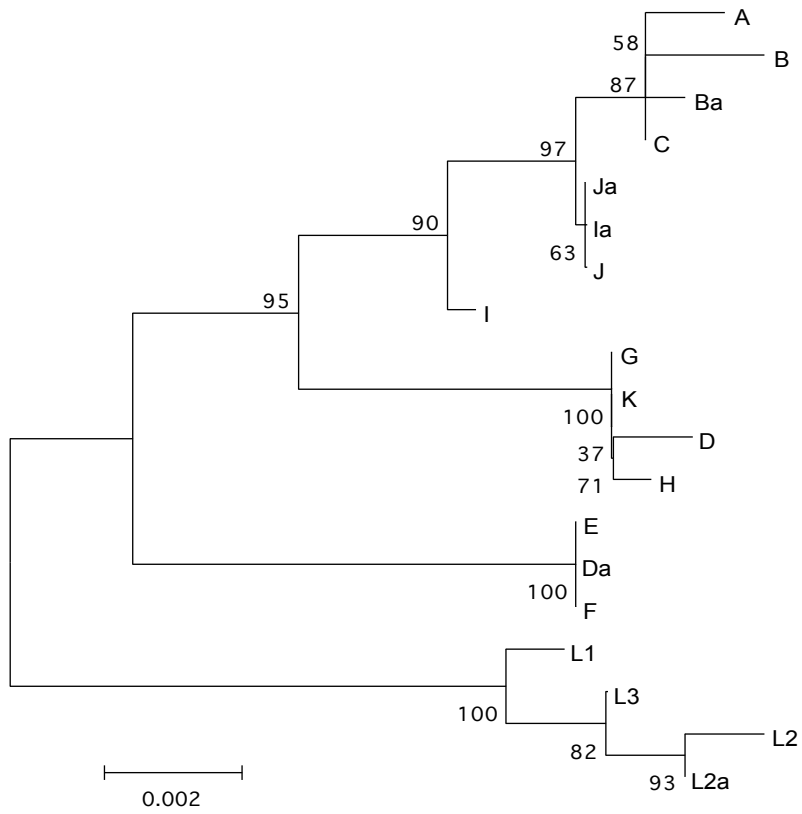

B

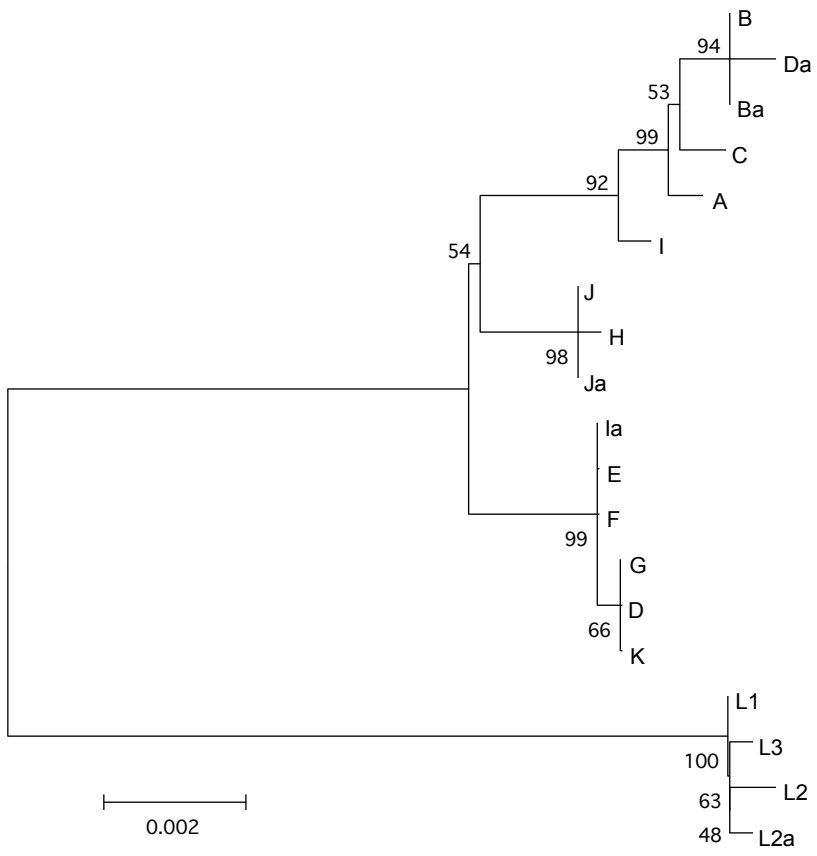

A

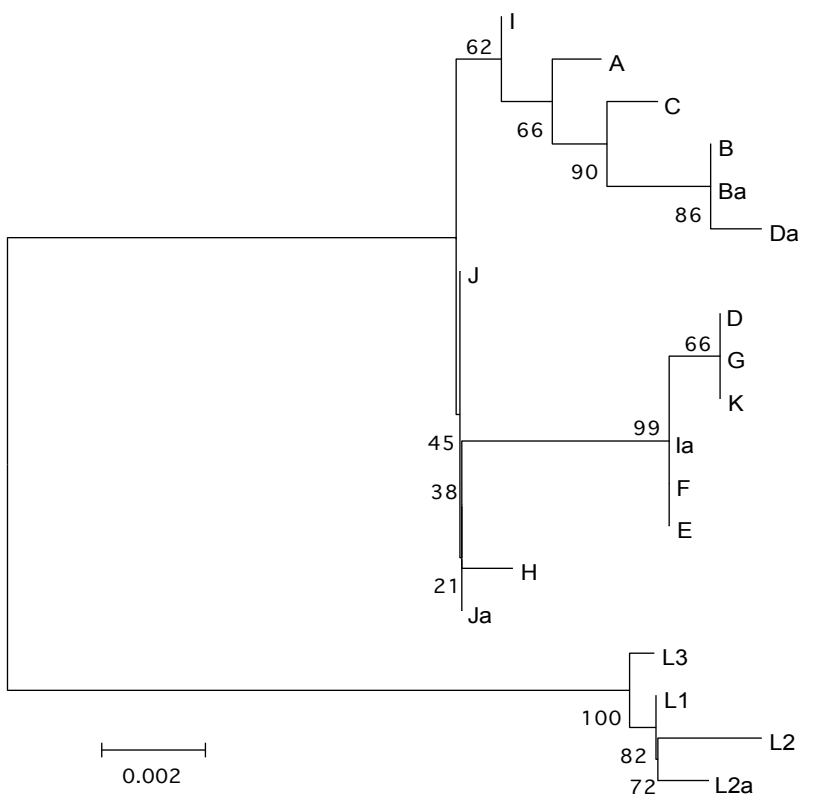

B

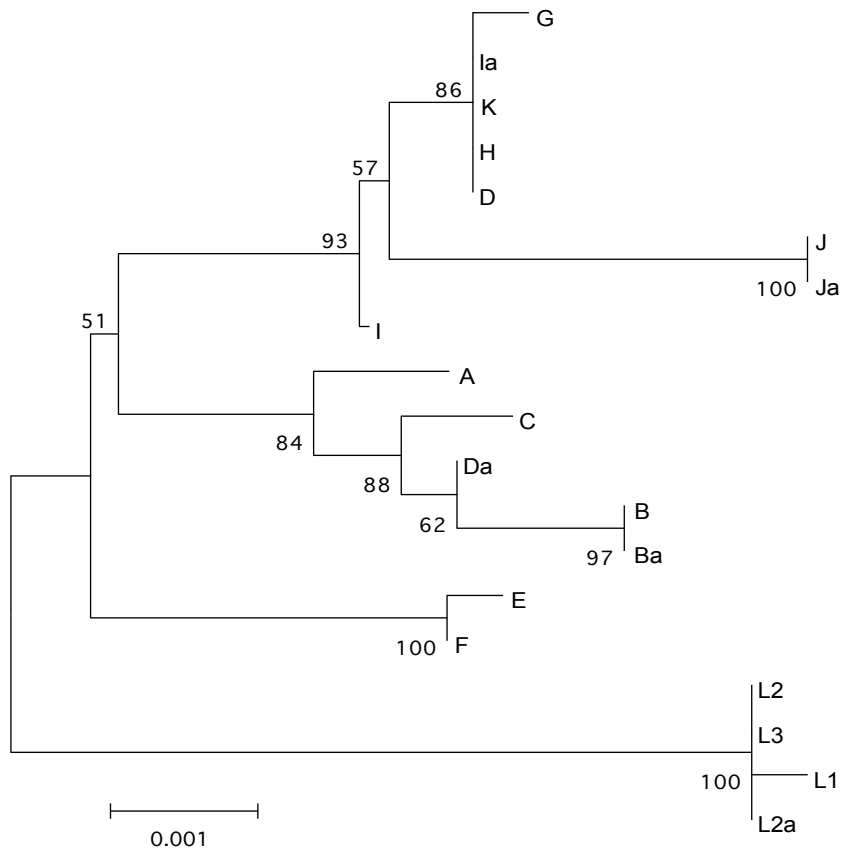

A

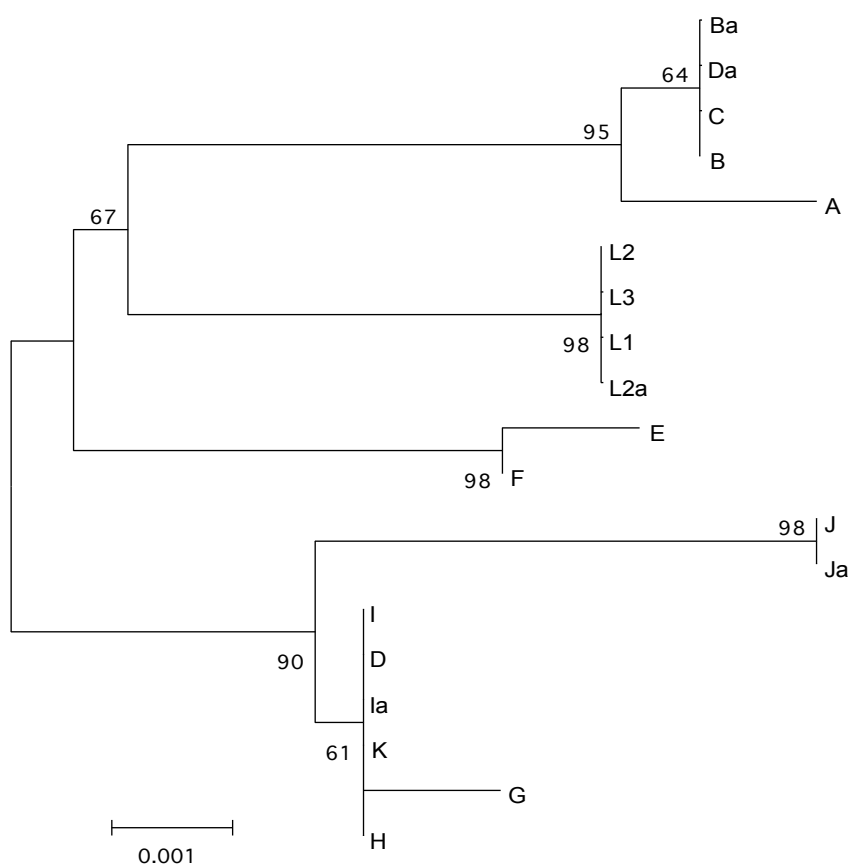

B

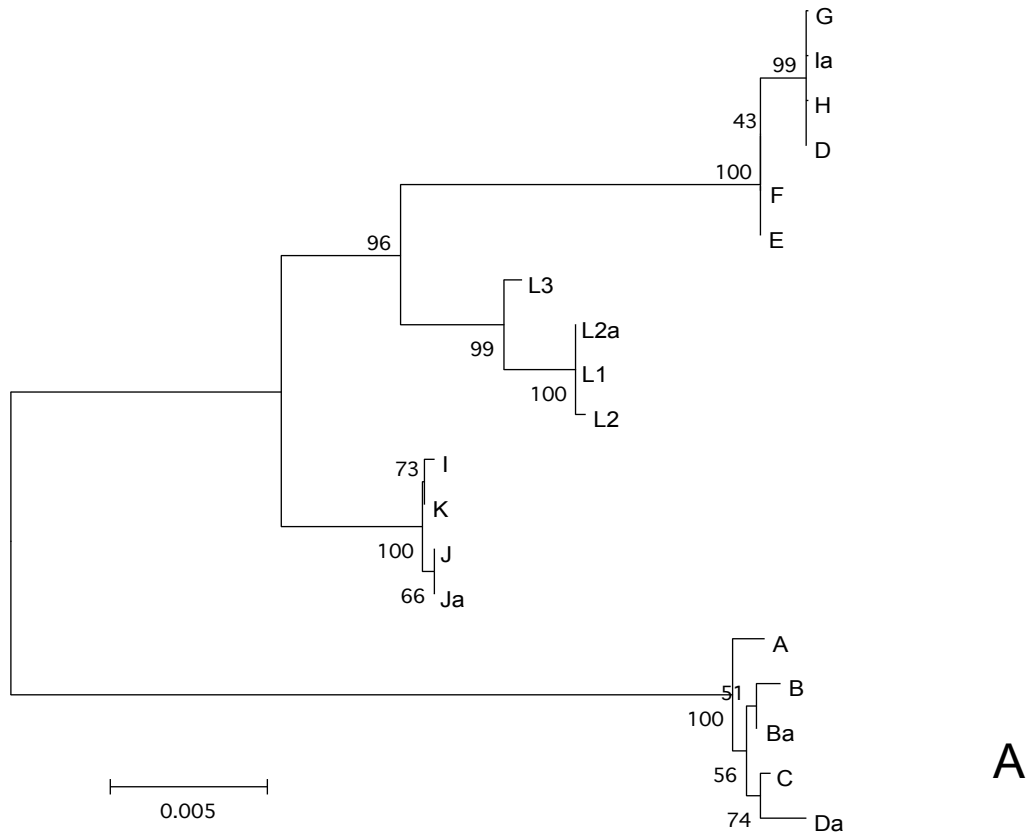

**A**

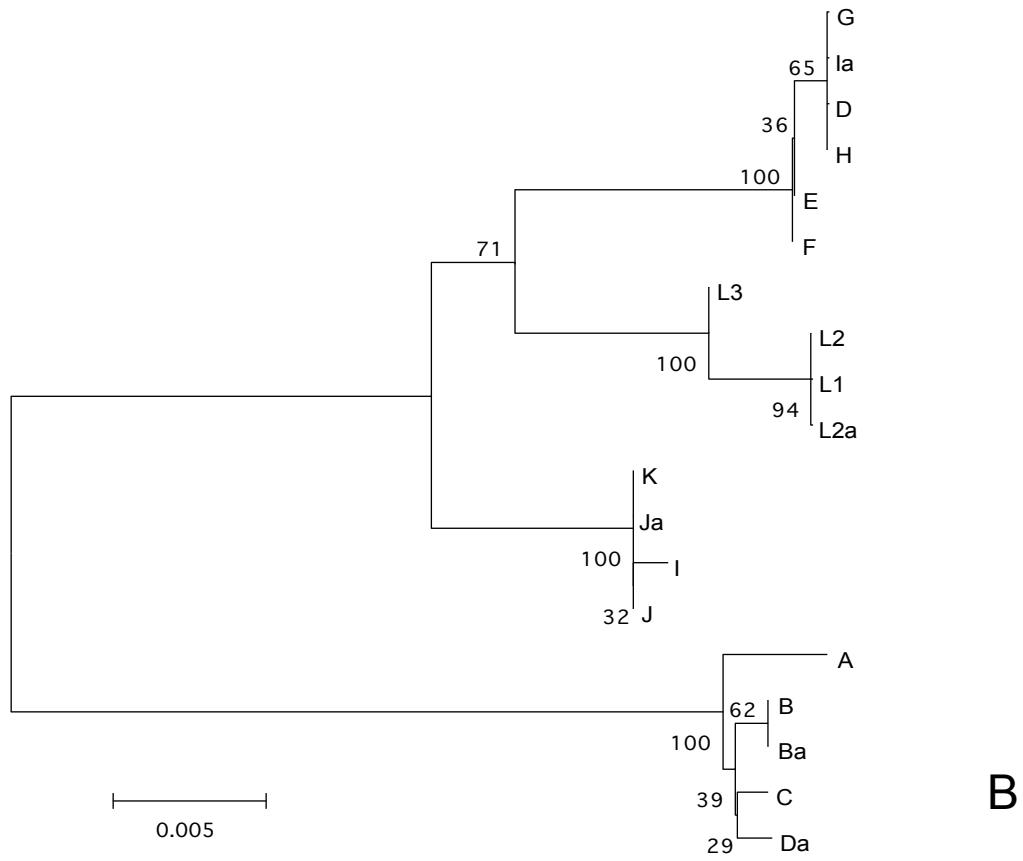

**B**

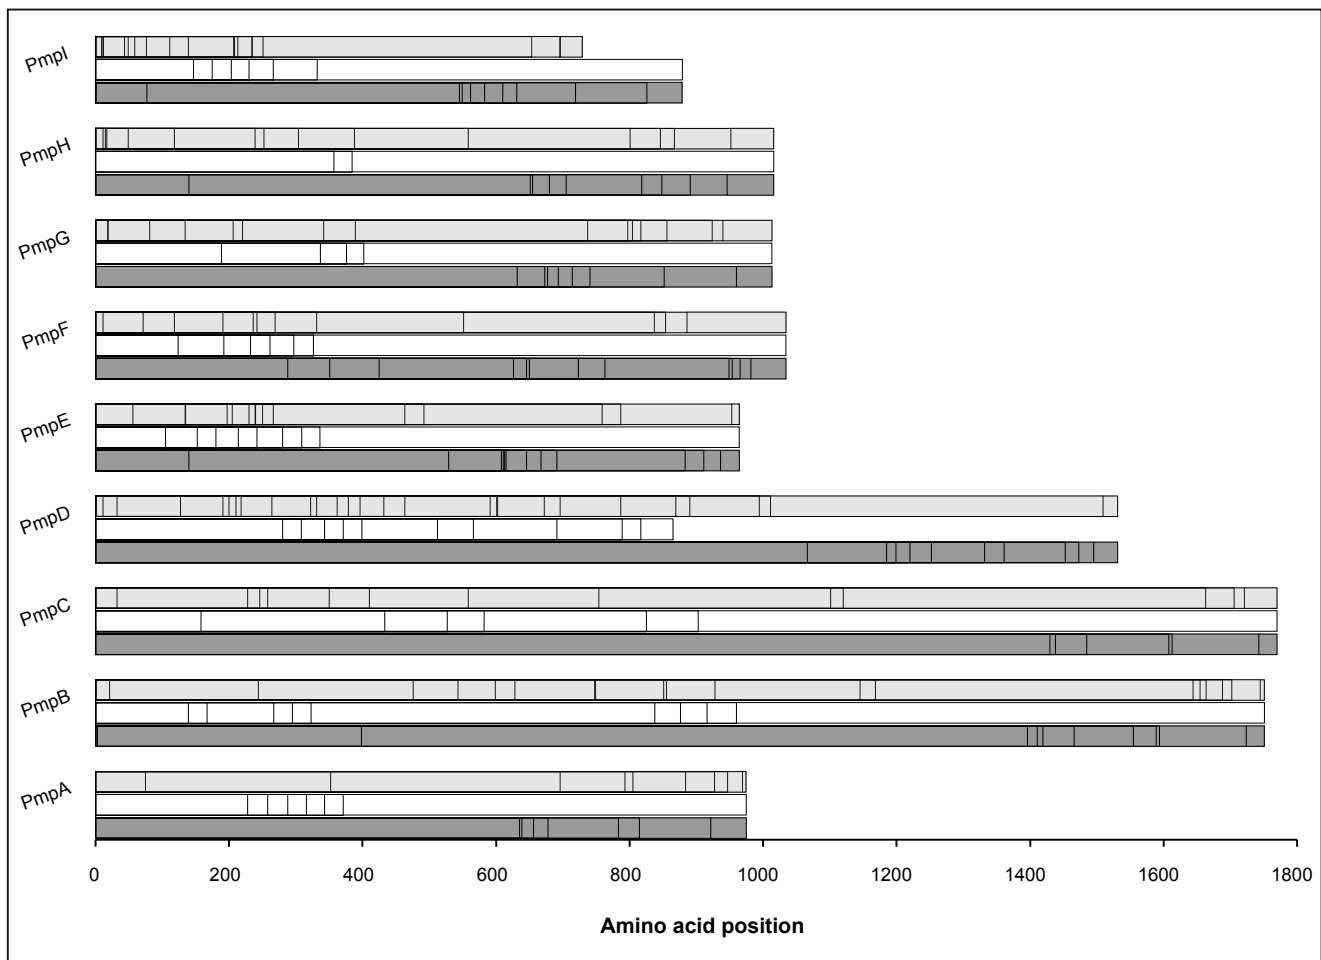

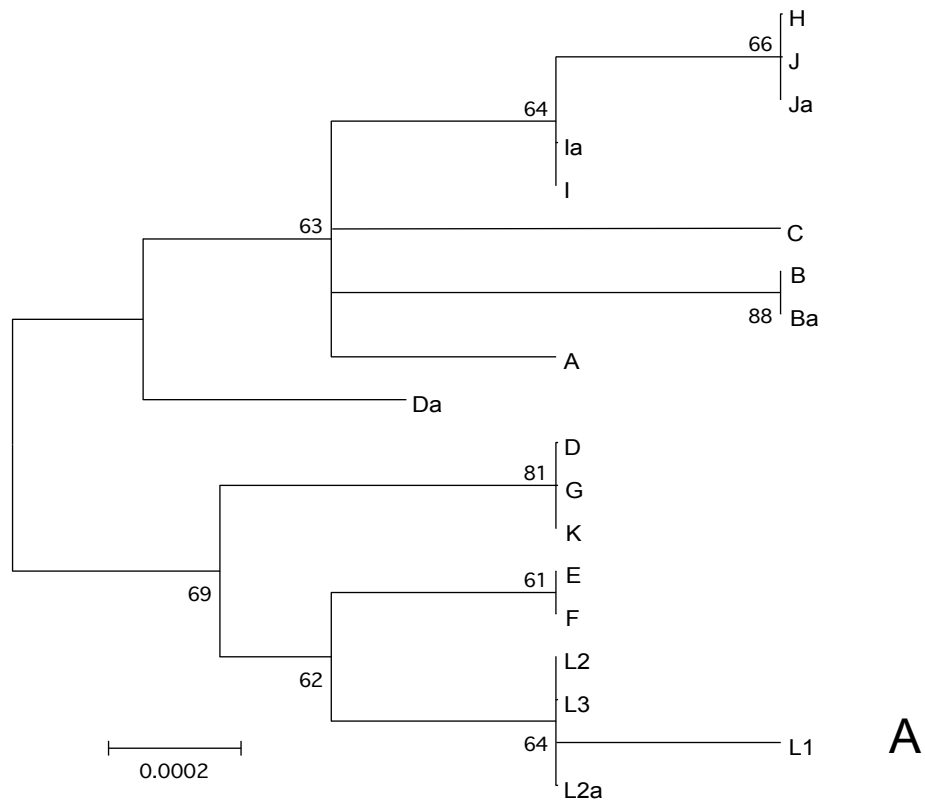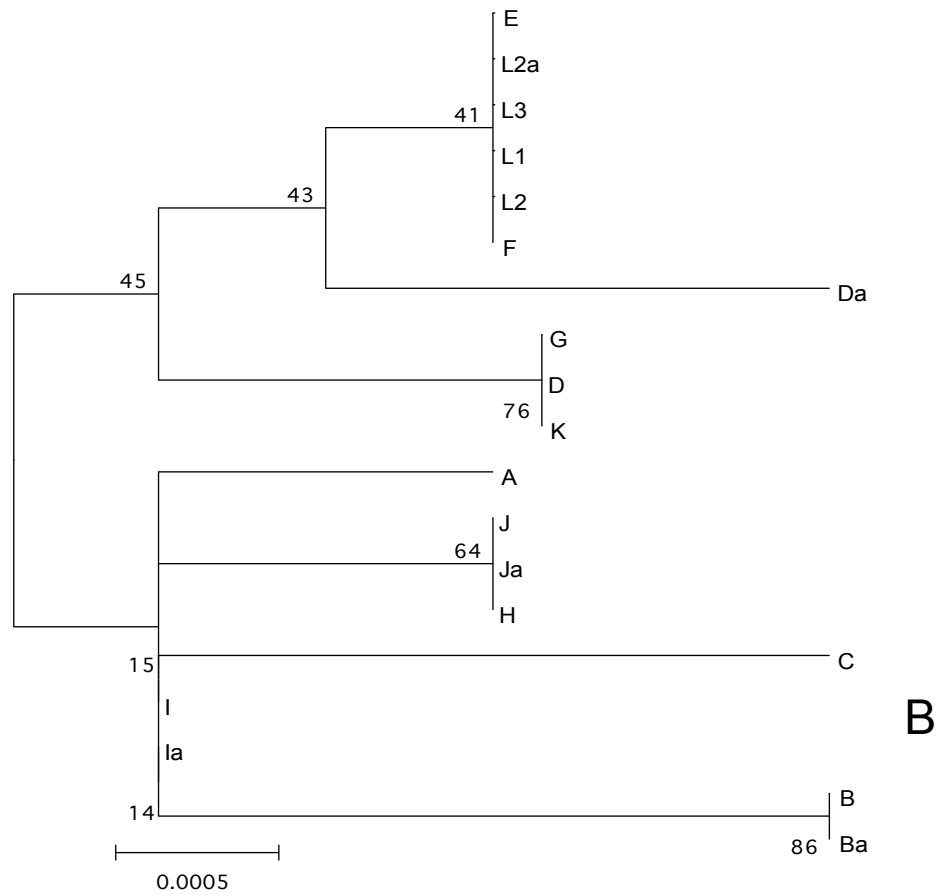

Supplement: jbacter_188_1_275__1.pdf [file jbacter_188_1_275__1.pdf]
